# Supplementary material
Source: publisher figshare collection journal article supplement (https://sage.figshare.com/ndownloader/files/15778874)
Supplement: Supplementary file 1 [file 15778874]

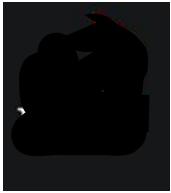

Institute of Biomedical Engineering  
University of New Brunswick  
25 Dineen Drive  
Fredericton, New Brunswick  
Canada E3B 5A3

Phone: (506) 453-4966  
Fax: (506) 453-4827  
www.unb.ca/biomed

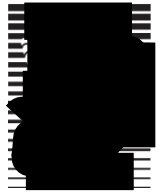

## Study: Refined Clothespin Relocation Test

### Subject Testing Form

Date:

ID:

☐ Male

☐ Female

Age:

Type of User:

☐ Prosthesis User

☐ Non-Prosthesis User

Handedness:

Amputation Type:

☐ Right

☐ Left

☐ Transradial

☐ Transhumeral

☐ Transcarpal

☐ Shoulder Disarticulation

☐ Other

Terminal Device:

Control Strategy:

Testing Measurements:

Table Height (hip):

### Prosthesis Usage

1. How long have you had your current prosthesis?

- ☐ Less than 6 months
- ☐ 6 - 12 months
- ☐ 1 - 2 years
- ☐ Longer than 2 years
- ☐ Not Applicable

2. How often do you wear your prosthesis on a given day?

- ☐ 0 - 4 hours
- ☐ 4 - 8 hours
- ☐ 8 - 12 hours
- ☐ Longer than 12 hours
- ☐ Not Applicable

### Record Test Times and Scores:

| Trunk Lateral Tilt (Upward Trials)   |   |   |   |   |   |         | Final<br>Score |
|--------------------------------------|---|---|---|---|---|---------|----------------|
| Trial<br>Time<br>UP                  | 1 | 2 | 3 | 4 | 5 | Average |                |
| Score                                |   |   |   |   |   |         |                |
| Shoulder Elevation (Downward Trials) |   |   |   |   |   |         |                |
| Trial                                | 1 | 2 | 3 | 4 | 5 | Average |                |
| Time<br>DOWN                         |   |   |   |   |   |         |                |
| Score                                |   |   |   |   |   |         |                |

Average Scores is rounded to nearest integer (round down if .5)

Final Score = (Lateral Tilt + Shoulder) x (1 / TimeUp+TimeDown) x 100
